# Supplementary material for: Low-temperature synthesis of Mn3O4 hollow-tetrakaidecahedrons and their application in electrochemical capacitors
Source: Royal Society of Chemistry journal article supplement (doi:10.1039/c1ce05337j), 2011-01-01
Supplement: c1ce05337j.pdf [file c1ce05337j.pdf]

*Supporting Information on*

## **Low-temperature synthesis of Mn<sub>3</sub>O<sub>4</sub> hollow-tetrakaidecahedrons and their application in electrochemical capacitors**

Ming Fang,<sup>\*a</sup> Xiaoli Tan,<sup>b</sup> Mao Liu,<sup>a</sup> Shenghong Kang,<sup>a</sup> Xiaoye Hu,<sup>a</sup> and Lide Zhang<sup>\*a</sup>

|                                                                                                                                              |         |
|----------------------------------------------------------------------------------------------------------------------------------------------|---------|
| Figure SI-1. Surface scanned energy-dispersive x-ray spectrometry (EDXS) images of C and Cu elements.                                        | Page 17 |
| Figure SI-2. The HRTEM image of Mn <sub>3</sub> O <sub>4</sub> micro- tetrakaidecahedron in a large scale view.                              | Page 18 |
| Figure SI-3. The irregular residues in Mn <sub>3</sub> O <sub>4</sub> hollow tetrakaidecahedron microstructure, which has a larger diameter. | Page 19 |
| Table SI-1. The experimental parameters table.                                                                                               | Page 20 |
| Figure SI-4. The FESEM images of the samples obtained with different experimental parameters corresponded to Table 1.                        | Page 20 |

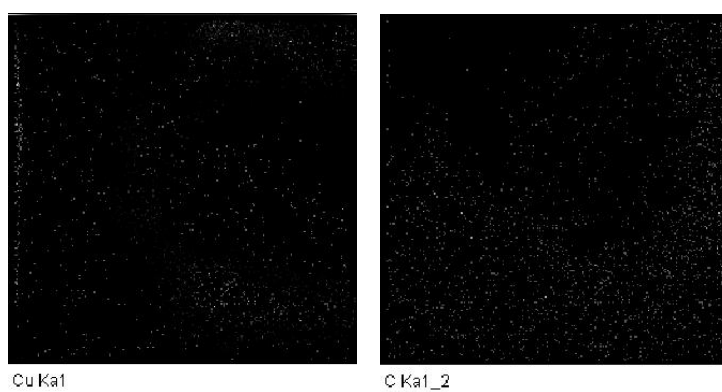

Figure SI-1. Surface scanned energy-dispersive x-ray spectrometry (EDXS) images of C and Cu elements.

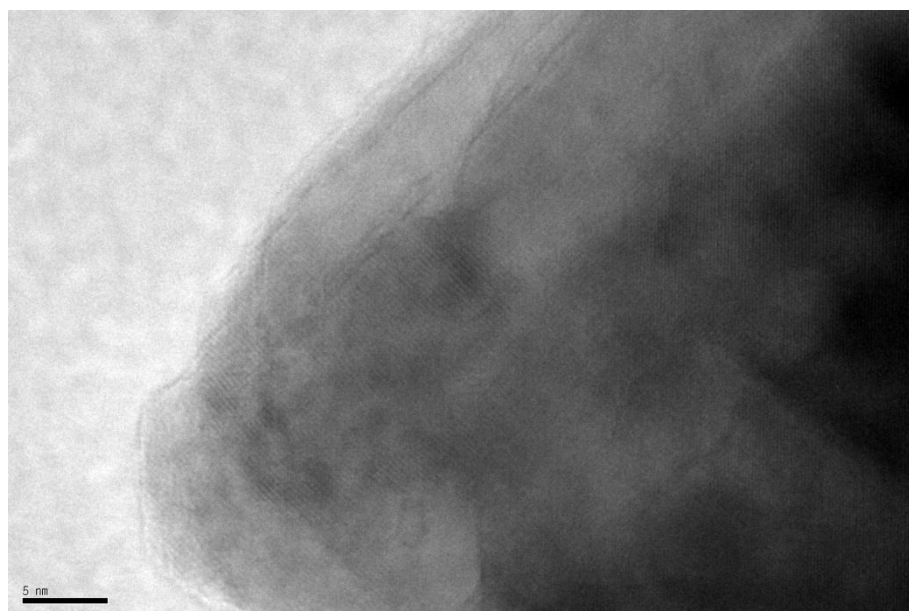

**Figure SI-2.** The HRTEM image of Mn<sub>3</sub>O<sub>4</sub> micro- tetradecahedron in a large scale view.

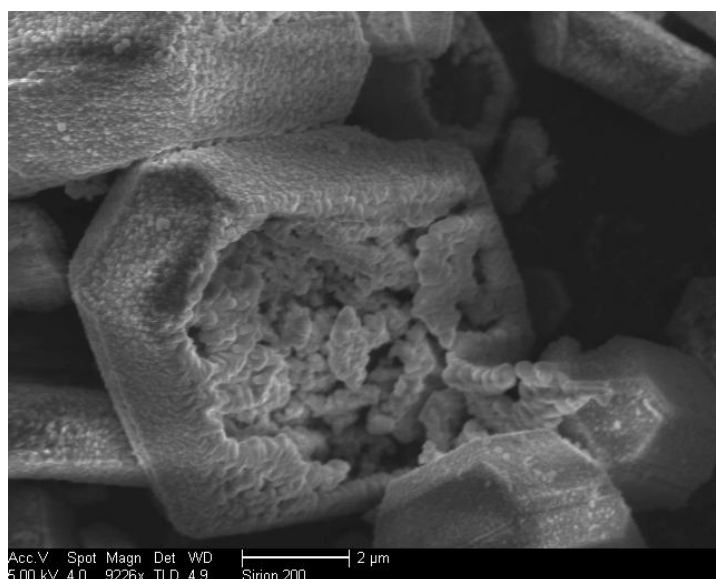

**Figure SI-3.** The irregular residues in Mn<sub>3</sub>O<sub>4</sub> hollow tetrakaidecahedron microstructure, which has a larger diameter.

**Table SI-1.** The experimental parameters table.

| sample | Mn (g) | NaClO <sub>4</sub> (g) | NaOH (g) | Temperature (°C)/<br>Time (h) |
|--------|--------|------------------------|----------|-------------------------------|
| S1     | 0.5    | 1                      | 3        | 200/24                        |
| S2     | 0.5    | 3                      | 3        | 200/24                        |
| S3     | 0.5    | 4                      | 3        | 200/24                        |
| S4     | 0.5    | 5                      | 3        | 200/24                        |
| S5     | 0.5    | 6                      | 3        | 200/24                        |
| S6     | 0.5    | 3                      | 5        | 200/24                        |
| S7     | 0.5    | 3                      | 10       | 200/24                        |
| S8     | 0.5    | 2                      | 3        | 180/24                        |
| S9     | 0.5    | 2                      | 3        | 150/24                        |
| S10    | 0.5    | 2                      | 3        | 200/2                         |
| S11    | 0.5    | 2                      | 3        | 200/0.5                       |
| S12    | 0.5    | 2                      | 3        | 200/0.17                      |

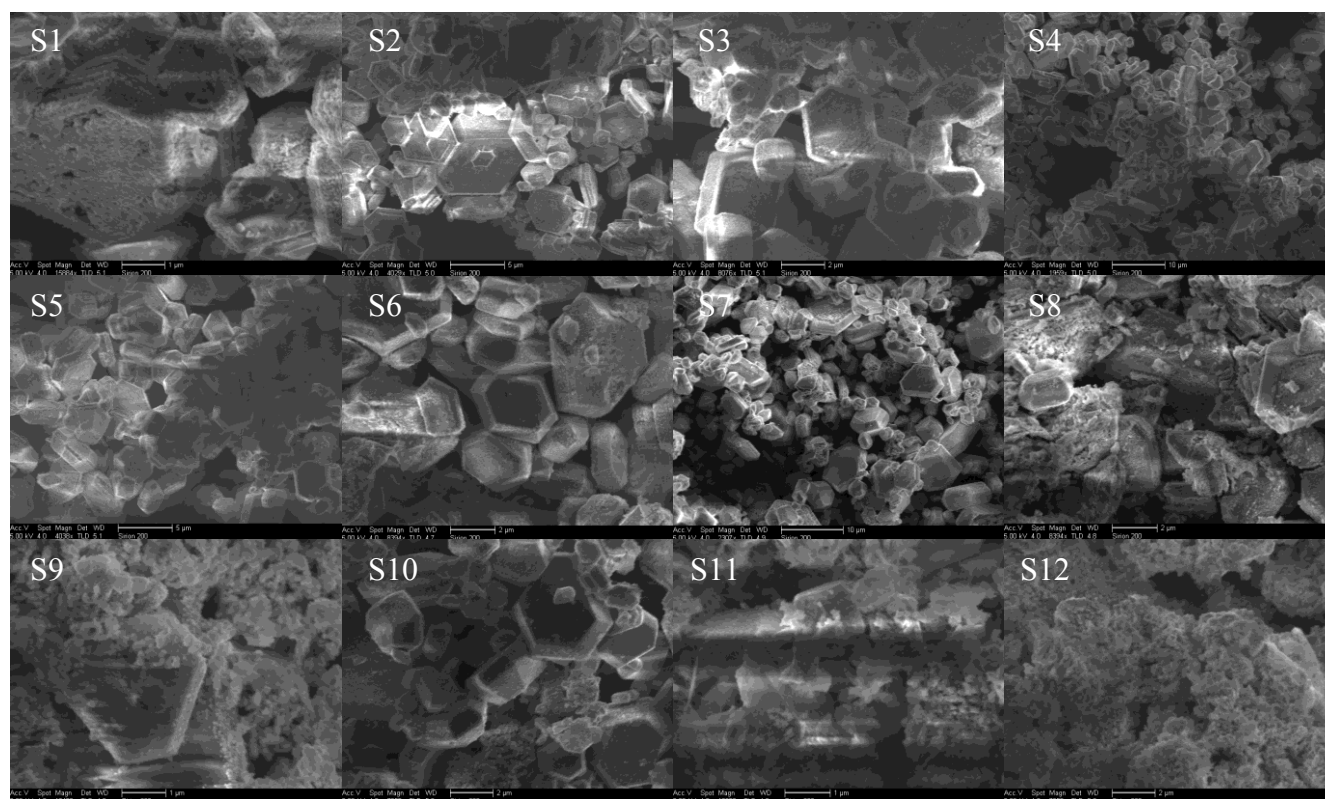

**Figure SI-4.** The FESEM images of the samples obtained with different experimental parameters corresponded to Table 1.
